# Supplementary material
Source: bioRxiv or medRxiv preprint supplement (https://www.biorxiv.org/highwire/filestream/130472/field_highwire_adjunct_files/9/430314-3.pdf)

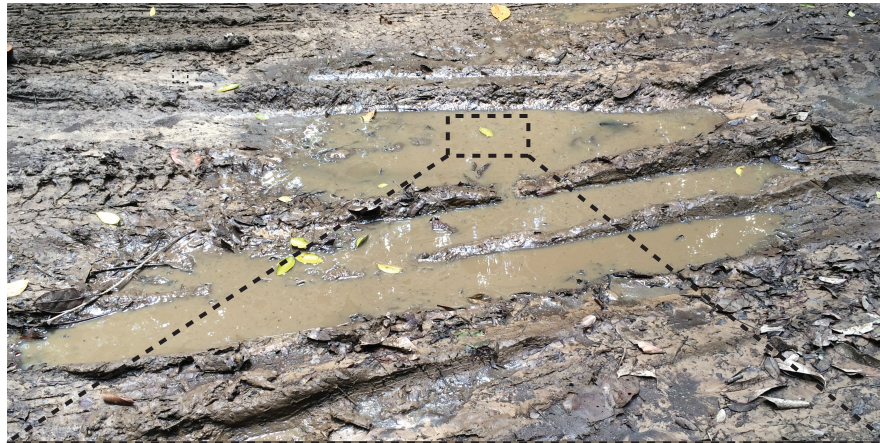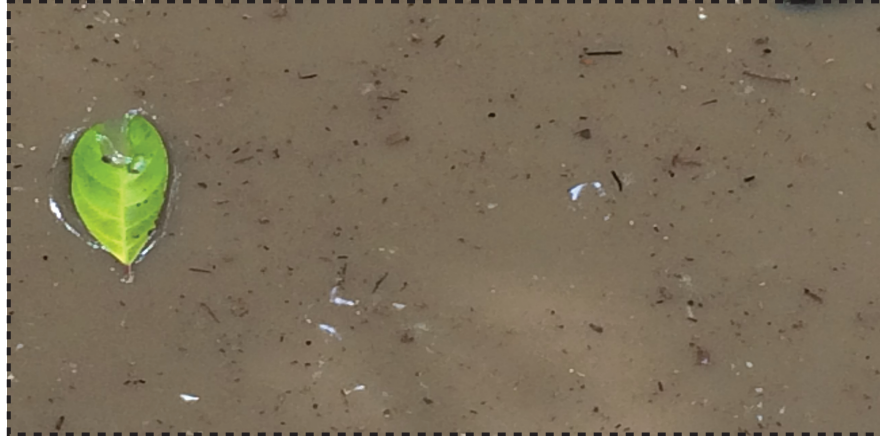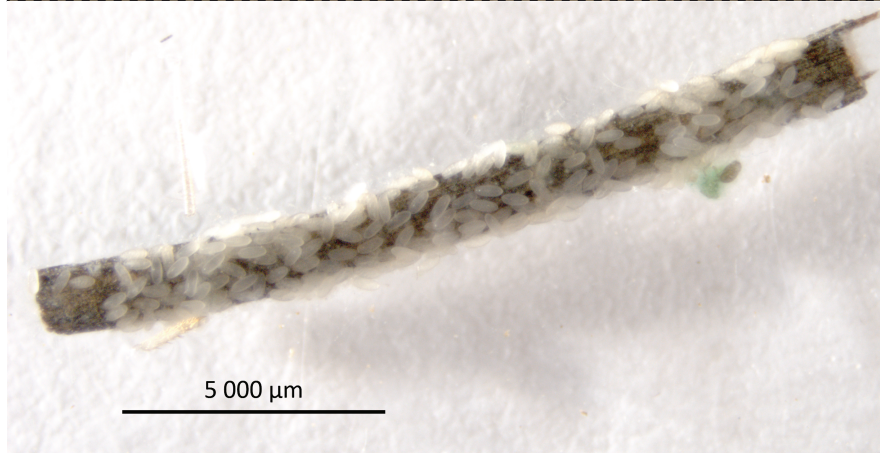

Supplement: Supplementary file [file 430314-3.pdf]
